# Supplementary material for: 3D Ultrasound Assessment of the Central Sulcus in Very Preterm Infants: Feasibility and Reproducibility of Opening Metrics Study
Source: Research Square preprint supplement (doi:10.21203/rs.3.rs-8108217/v1), 2025-12-18
Supplement: Supplementary file 1 [file dbf1943a6f5478a5f4bcd3e1.docx]

# Supplementary material

|  | MALE | FEMALE | DIFF | P |
| --- | --- | --- | --- | --- |
| VOLUME | 0.378 (0.204) | 0.321 (0.175) | 0.056 | 0.172 |
| TORTUOSITY | 1.211 (0.046) | 1.233 (0.067) | -0.022 | 0.060 |
| SURFACE | 5.712 (2.430) | 5.272 (2.161) | 0.440 | 0.377 |
| LENGHT | 29.944 (9.513) | 27.909 (10.657) | -2.034 | 0.340 |
| MEAN DEPTH | 7.225 (2.641) | 6.664 (1.863) | 0.560 | 0.270 |
| MEAN LINEAL  DEPTH | 5.134 (1.736) | 4.861 (1.281) | 0.273 | 0.418 |
| MAX DEPTH | 12.346 (5.767) | 11.214 (4.416) | 1.132 | 0.317 |
| MAX LINEAL  DEPTH | 9.120 (2.558) | 8.512 (2.254) | 0.608 | 0.246 |
| MEAN OPENING | 4.463 (1.717) | 4.085 (1.832) | 0.378 | 0.316 |
| MAX OPENING | 7.775 (2.821) | 7.110 (3.012) | 0.666 | 0.283 |
| MEAN FOLD  OPENING | 3.160 (1.053) | 2.839 (1.063) | 0.322 | 0.156 |
| MAX FOLD  OPENING | 8.163 (2.853) | 7.305 (2.936) | 0.858 | 0.166 |

**Table A1.** Central sulcus morphological parameters by sex. Diff: difference.
